# Supplementary material
Source: HighWire-hosted journal article supplement (http://www.jrheum.org/highwire/filestream/29783/field_highwire_adjunct_files/0/151156DataSuppl.pdf)
Supplement: 151156DataSuppl.pdf [file 151156DataSuppl.pdf]

## ONLINE SUPPLEMENTARY DATA

| Key Data Sources                                                                                                                                                                                  |                                                                                                                                                                                                                                                                                                                           |                                                                                                                                                                                                                                                                                                                           |
|---------------------------------------------------------------------------------------------------------------------------------------------------------------------------------------------------|---------------------------------------------------------------------------------------------------------------------------------------------------------------------------------------------------------------------------------------------------------------------------------------------------------------------------|---------------------------------------------------------------------------------------------------------------------------------------------------------------------------------------------------------------------------------------------------------------------------------------------------------------------------|
|                                                                                                                                                                                                   | ONTARIO                                                                                                                                                                                                                                                                                                                   | QUEBEC                                                                                                                                                                                                                                                                                                                    |
| <b>Provincial Health Insurance Plan</b>                                                                                                                                                           | <b>Ontario Health Insurance Plan (OHIP)</b>                                                                                                                                                                                                                                                                               | <b>Regie de l'assurance maladie du Quebec (RAMQ)</b>                                                                                                                                                                                                                                                                      |
| <b>Provincial Registry</b>                                                                                                                                                                        | <b>OHIP Registered Persons Database</b>                                                                                                                                                                                                                                                                                   | <b>RAMQ registrant database</b>                                                                                                                                                                                                                                                                                           |
| Main Data Elements                                                                                                                                                                                | Demographic data (sex, dates of birth and death, postal code, socioeconomic data)                                                                                                                                                                                                                                         | Demographic data (sex, dates of birth and death, postal code, socioeconomic data)                                                                                                                                                                                                                                         |
| <b>Physician billing claims database</b>                                                                                                                                                          | <b>OHIP claims history database</b>                                                                                                                                                                                                                                                                                       | <b>RAMQ medical services database</b>                                                                                                                                                                                                                                                                                     |
| Coverage                                                                                                                                                                                          | 1991 onwards                                                                                                                                                                                                                                                                                                              | 1983 onwards                                                                                                                                                                                                                                                                                                              |
| Coding System                                                                                                                                                                                     | <u>Diagnoses:</u><br>OHIP codes based on ICD-8/9; 3 digits<br><u>Procedures:</u><br>OHIP procedure/fee codes                                                                                                                                                                                                              | <u>Diagnoses:</u><br>ICD-9 Quebec version; 4 digits<br><u>Procedures:</u><br>RAMQ procedure codes                                                                                                                                                                                                                         |
| Main Data Elements                                                                                                                                                                                | <ul style="list-style-type: none"> <li>• A diagnosis code representing the main reason for the visit,</li> <li>• Procedure codes for services provided</li> <li>• Date and location of services, physician type</li> </ul>                                                                                                | <ul style="list-style-type: none"> <li>• A diagnosis code representing the main reason for the visit,</li> <li>• Procedure codes for services provided</li> <li>• Date and location of services, physician type</li> </ul>                                                                                                |
| <b>Hospital inpatient database</b>                                                                                                                                                                | <b>Canadian Institute for Health Information Discharge Abstract Database (CIHI-DAD)</b>                                                                                                                                                                                                                                   | <b>Maintenance et exploitation des données pour l'étude de la clientèle hospitalière (MED-ECHO)</b>                                                                                                                                                                                                                       |
| Coverage                                                                                                                                                                                          | 1988 onwards                                                                                                                                                                                                                                                                                                              | 1980 onwards                                                                                                                                                                                                                                                                                                              |
| Coding System                                                                                                                                                                                     | <u>Diagnoses:</u><br>ICD-10: 2002-present; up to 25 diagnoses per encounter<br>ICD-9: prior to 2002; up to 16 diagnoses per encounter<br><u>Procedures:</u><br>ICD10-CCI: 2002-present<br>CCP: prior to 2002                                                                                                              | <u>Diagnoses:</u><br>ICD-10: 2006-present; up to 25 diagnoses per encounter<br>ICD-9: prior to 2006; up to 16 diagnoses per encounter<br><u>Procedures:</u><br>ICD10-CCI: 2006-present<br>CCP: prior to 2006                                                                                                              |
| Main Data Elements                                                                                                                                                                                | <ul style="list-style-type: none"> <li>• Demographic data (Date of birth, sex, postal code, residence)</li> <li>• Clinical data (diagnoses, procedures, physician)</li> <li>• Administrative data (institution identifiers, admission category, dates of admission and discharge, length of stay, disposition)</li> </ul> | <ul style="list-style-type: none"> <li>• Demographic data (Date of birth, sex, postal code, residence)</li> <li>• Clinical data (diagnoses, procedures, physician)</li> <li>• Administrative data (institution identifiers, admission category, dates of admission and discharge, length of stay, disposition)</li> </ul> |
| <b>Pharmacy claims database</b>                                                                                                                                                                   | <b>Ontario Drug Benefit Prescription Claims Database</b>                                                                                                                                                                                                                                                                  | <b>RAMQ Prescription Claims Database</b>                                                                                                                                                                                                                                                                                  |
| Coverage                                                                                                                                                                                          | 1990 onwards                                                                                                                                                                                                                                                                                                              | 1997 onwards                                                                                                                                                                                                                                                                                                              |
| Coding System                                                                                                                                                                                     | Drug Identification Numbers                                                                                                                                                                                                                                                                                               | Drug Identification Numbers                                                                                                                                                                                                                                                                                               |
| Main Data Elements                                                                                                                                                                                | <ul style="list-style-type: none"> <li>• Drug quantity</li> <li>• Date prescription was dispensed</li> <li>• Number of days supplied</li> <li>• Drug strength</li> <li>• Route of administration</li> </ul>                                                                                                               | <ul style="list-style-type: none"> <li>• Drug quantity</li> <li>• Date prescription was dispensed</li> <li>• Number of days supplied</li> <li>• Drug strength</li> <li>• Route of administration</li> </ul>                                                                                                               |
| Abbreviation: ICD: International Classification of Diseases; CCI: Canadian Classification of Health Intervention; CCP: Canadian Classification of Diagnostic, Therapeutic and Surgical Procedures |                                                                                                                                                                                                                                                                                                                           |                                                                                                                                                                                                                                                                                                                           |

| Outcome Codes: Joint Surgery |                                                                                                                     |
|------------------------------|---------------------------------------------------------------------------------------------------------------------|
| CCI Codes                    | Definition                                                                                                          |
| 1EL53                        | Implantation of internal device, temporomandibular joint [TMJ]                                                      |
| 1SQ53                        | Implantation of device, pelvis                                                                                      |
| 1TA53                        | Implantation of internal device, shoulder joint                                                                     |
| 1TM53                        | Implantation of internal device, elbow joint                                                                        |
| 1UB53                        | Implantation of internal device, wrist joint                                                                        |
| 1UC53                        | Implantation of internal device, distal radioulnar joint and carpal joints and bones                                |
| 1UG53                        | Implantation of internal device, metacarpophalangeal joint(s)                                                       |
| 1UH53                        | Implantation of internal device, first metacarpophalangeal joint                                                    |
| 1UK53                        | Implantation of internal device, interphalangeal joints of hand                                                     |
| 1UM53                        | Implantation of internal device, first interphalangeal joint of hand                                                |
| 1VA53                        | Implantation of internal device, hip joint                                                                          |
| 1VG53                        | Implantation of internal device, knee joint                                                                         |
| 1VP53                        | Implantation of internal device, patella                                                                            |
| 1WA53                        | Implantation of internal device, ankle joint                                                                        |
| 1WE53                        | Implantation of internal device, tarsal bones and intertarsal joints [hindfoot, midfoot]                            |
| 1WI53                        | Implantation of internal device, first metatarsal bone and first metatarsophalangeal joint                          |
| 1WJ53                        | Implantation of internal device, tarsometatarsal joints, metatarsal bones and metatarsophalangeal joints [forefoot] |
| 1WM53                        | Implantation of internal device, interphalangeal joints of toe                                                      |
| 1WN53                        | Implantation of internal device, first interphalangeal joint of toe                                                 |
| CCP Codes                    |                                                                                                                     |
| 8860                         | Temporomandibular arthroplasty                                                                                      |
| 9330                         | Arthroplasty of foot and toe                                                                                        |
| 9331                         | Arthroplasty of foot and toe with synthe                                                                            |
| 9339                         | Other arthroplasty of foot and toe                                                                                  |
| 9340                         | Revision of total knee replacement cemented or uncemented                                                           |
| 9341                         | Total knee replacement (geomedic) (polyc                                                                            |
| 9348                         | Total ankle replacement                                                                                             |
| 9350                         | Total hip replacement                                                                                               |
| 9351                         | Total hip replacement with methyl methacrylate                                                                      |
| 9352                         | Revision cemented with methyl methacrylate                                                                          |
| 9353                         | Revision uncemented                                                                                                 |
| 9359                         | Other total hip replacement                                                                                         |
| 9360                         | Other arthroplasty of hip                                                                                           |
| 9361                         | Replacement of head of femur with use of methyl methacrylate                                                        |
| 9362                         | Other replacement of head of femur                                                                                  |
| 9363                         | Replacement of acetabulum with use of methyl methacrylate                                                           |
| 9364                         | Other replacement of acetabulum                                                                                     |
| 9370                         | Arthroplasty of hand and finger                                                                                     |
| 9371                         | Arthroplasty of hand and finger with syn                                                                            |
| 9380                         | Arthroplasty of upper extremity, except hand                                                                        |
| 9381                         | Arthroplasty of shoulder with synthetic                                                                             |
| 9384                         | Arthroplasty of elbow with synthetic pro                                                                            |
| 9386                         | Arthroplasty of carpals with synthetic p                                                                            |

| <b>Covariates</b>                |                                                                                                                                                                                                                                                                                                                                                                 |                                                                                                                                                                                                                                                                                                                           |
|----------------------------------|-----------------------------------------------------------------------------------------------------------------------------------------------------------------------------------------------------------------------------------------------------------------------------------------------------------------------------------------------------------------|---------------------------------------------------------------------------------------------------------------------------------------------------------------------------------------------------------------------------------------------------------------------------------------------------------------------------|
| <b>Definitions</b>               | <b>ONTARIO</b>                                                                                                                                                                                                                                                                                                                                                  | <b>QUEBEC</b>                                                                                                                                                                                                                                                                                                             |
| Socioeconomic Status             | Defined using patient postal codes to determine regional median household income quintile from the Statistics Canada Census                                                                                                                                                                                                                                     | Defined using social assistance status and derived using patient postal codes to determine regional employment rate, income, and education using Census data                                                                                                                                                              |
| <b>Comorbidities<sup>1</sup></b> |                                                                                                                                                                                                                                                                                                                                                                 |                                                                                                                                                                                                                                                                                                                           |
| Osteoarthritis                   | One or more hospitalizations or two or more OHIP claims<br><b>OHIP:</b> 715<br><b>ICD9:</b> 715<br><b>ICD10:</b> M15-M19                                                                                                                                                                                                                                        | One or more hospitalizations or two or more physician claims<br><br><b>ICD9:</b> 715<br><b>ICD10:</b> M15-M19                                                                                                                                                                                                             |
| COPD/Asthma <sup>2</sup>         | One or more hospitalizations or two or more OHIP claims for asthma within 2 years; or one or more OHIP claims for COPD<br><b>OHIP:</b> 491, 492, 493, 496<br><b>ICD9:</b> 491, 492, 493, 496<br><b>ICD10:</b> J41, J42, J43, J44, J45, J46,                                                                                                                     | One or more hospitalizations or two or more physician claims<br><br><b>ICD9:</b> 490-505, 506.4<br><b>ICD10:</b> I278, I279, J40-J47, J60-J67, J684, J701, J703                                                                                                                                                           |
| Diabetes <sup>2</sup>            | One or more hospitalizations or two or more OHIP claims or one or more OHIP fee codes<br><b>OHIP:</b> 250 Fee code: Q040, K029, K030<br><b>ICD9:</b> 250<br><b>ICD10:</b> E10-E14                                                                                                                                                                               | One or more hospitalizations or two or more physician claims<br><br><b>ICD9:</b> 250<br><b>ICD10:</b> E10-E14                                                                                                                                                                                                             |
| Coronary artery disease          | One or more hospitalizations or two or more OHIP claims<br><b>OHIP:</b> 412<br><b>ICD9:</b> 410, 411, 412, 413, 414<br><b>ICD10:</b> I20, I21, I22, I23, I24, I250, I251, I252, I254, I255, I256, I258, I259                                                                                                                                                    | One or more hospitalizations or two or more physician claims<br><br><b>ICD9:</b> 410, 411, 412, 413, 414<br><b>ICD10:</b> I20, I21, I22, I23, I24, I250, I251, I252, I254, I255, I256, I258, I259                                                                                                                         |
| Cancer                           | One or more hospitalizations or two or more OHIP claims<br><b>OHIP:</b> 140 to 209<br><b>ICD9:</b> 140 to 209<br><b>ICD10:</b> C00 to C100                                                                                                                                                                                                                      | One or more hospitalizations or two or more physician claims<br><br><b>ICD9:</b> 140 to 209<br><b>ICD10:</b> C00 to C100                                                                                                                                                                                                  |
| Extra-articular RA Features      | One or more hospitalizations or two or more OHIP claims<br><b>OHIP:</b> 511, 515, 466, 686<br><b>ICD 9:</b> 515, 379, 446, 7148, 5110, 5118, 5119, 5064, 5081, 5163, 7707, 7141, 7142, 7102, 6860, 3571, 3540, 3555, 2773<br><b>ICD10:</b> J90, J91, J84, I39, H15, L95, L88, E85, J990, M050, I528, I418, I328, H193, M350, M051, M052, M053, G635, G560, G575 | One or more hospitalizations or physician claims<br><br><b>ICD 9:</b> 515, 379, 446, 7148, 5110, 5118, 5119, 5064, 5081, 5163, 7707, 7141, 7142, 7102, 6860, 3571, 3540, 3555, 2773<br><b>ICD10:</b> J90, J91, J84, I39, H15, L95, L88, E85, J990, M050, I528, I418, I328, H193, M350, M051, M052, M053, G635, G560, G575 |
| Osteoporosis                     | One or more hospitalizations or two or more OHIP claims<br><b>OHIP:</b> 733<br><b>ICD9:</b> 7330<br><b>ICD10:</b> M80, M81                                                                                                                                                                                                                                      | One or more hospitalizations or two or more physician claims<br><br><b>ICD9:</b> 7330<br><b>ICD10:</b> M80, M81                                                                                                                                                                                                           |

# **Covariates (continued)**

|                             |                                                                                                                                                                                                                                                     |                                                                                                                                                                                                                            |
|-----------------------------|-----------------------------------------------------------------------------------------------------------------------------------------------------------------------------------------------------------------------------------------------------|----------------------------------------------------------------------------------------------------------------------------------------------------------------------------------------------------------------------------|
| Acute myocardial infarction | One or more hospitalizations<br><b>ICD-9:</b> 410, 412<br><b>ICD10:</b> I21, I22, I252                                                                                                                                                              | One or more hospitalizations<br><b>ICD-9:</b> 410, 412<br><b>ICD10:</b> I21, I22, I252                                                                                                                                     |
| Chronic renal failure       | One or more hospitalizations or OHIP claims<br><b>OHIP:</b> 403, 404, 585<br><b>ICD9:</b> 403, 404, 585, V56<br><b>ICD10:</b> N18, Z49, Z992, T824, I120, V451, N032, N033, N034, N035, N036, N037, N052, N053, N054, N055, N056, N057, I131, I132, | One or more hospitalizations or physician claims<br><b>ICD9:</b> 403, 404, 585, V56<br><b>ICD10:</b> N18, Z49, Z992, T824, I120, V451, N032, N033, N034, N035, N036, N037, N052, N053, N054, N055, N056, N057, I131, I132, |
| Acute renal failure         | One or more hospitalizations or OHIP claims<br><b>OHIP:</b> 584, 586<br><b>ICD9:</b> 584, 586<br><b>ICD10:</b> N17, N19                                                                                                                             | One or more hospitalizations or physician claims<br><b>ICD9:</b> 584, 586<br><b>ICD10:</b> N17, N19                                                                                                                        |
| Cerebrovascular disease     | One or more hospitalizations<br><b>ICD9:</b> 434, 436<br><b>ICD10:</b> I63, I64                                                                                                                                                                     | One or more hospitalizations<br><b>ICD9:</b> 434, 436<br><b>ICD10:</b> I63, I64                                                                                                                                            |

<sup>1</sup> Ascertained over the 3 years prior to baseline unless specified

<sup>2</sup> Ascertained over all available records (1990 onwards) in Ontario, but over 3 years in Quebec
